# Supplementary material
Source: PubMed Central journal article supplement (PMC5423191)
Supplement: MOL2-10-1305-s002.pdf [file MOL2-10-1305-s002.pdf]

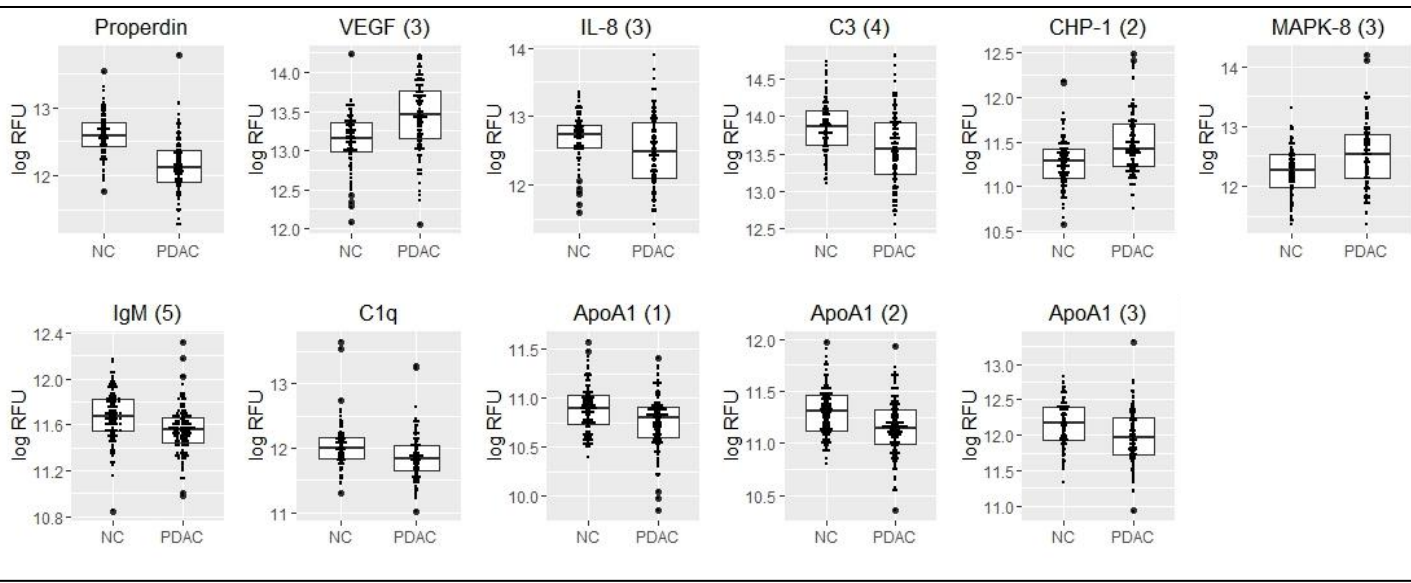

**Supplementary Figure 1. Discrimination of PDAC vs NC.** Dotplots of the 11 antibodies identified by ANOVA filtering to  $q < 0.1$
