# Supplementary material
Source: PubMed Central journal article supplement (PMC5423191)
Supplement: MOL2-10-1305-s003.pdf [file MOL2-10-1305-s003.pdf]

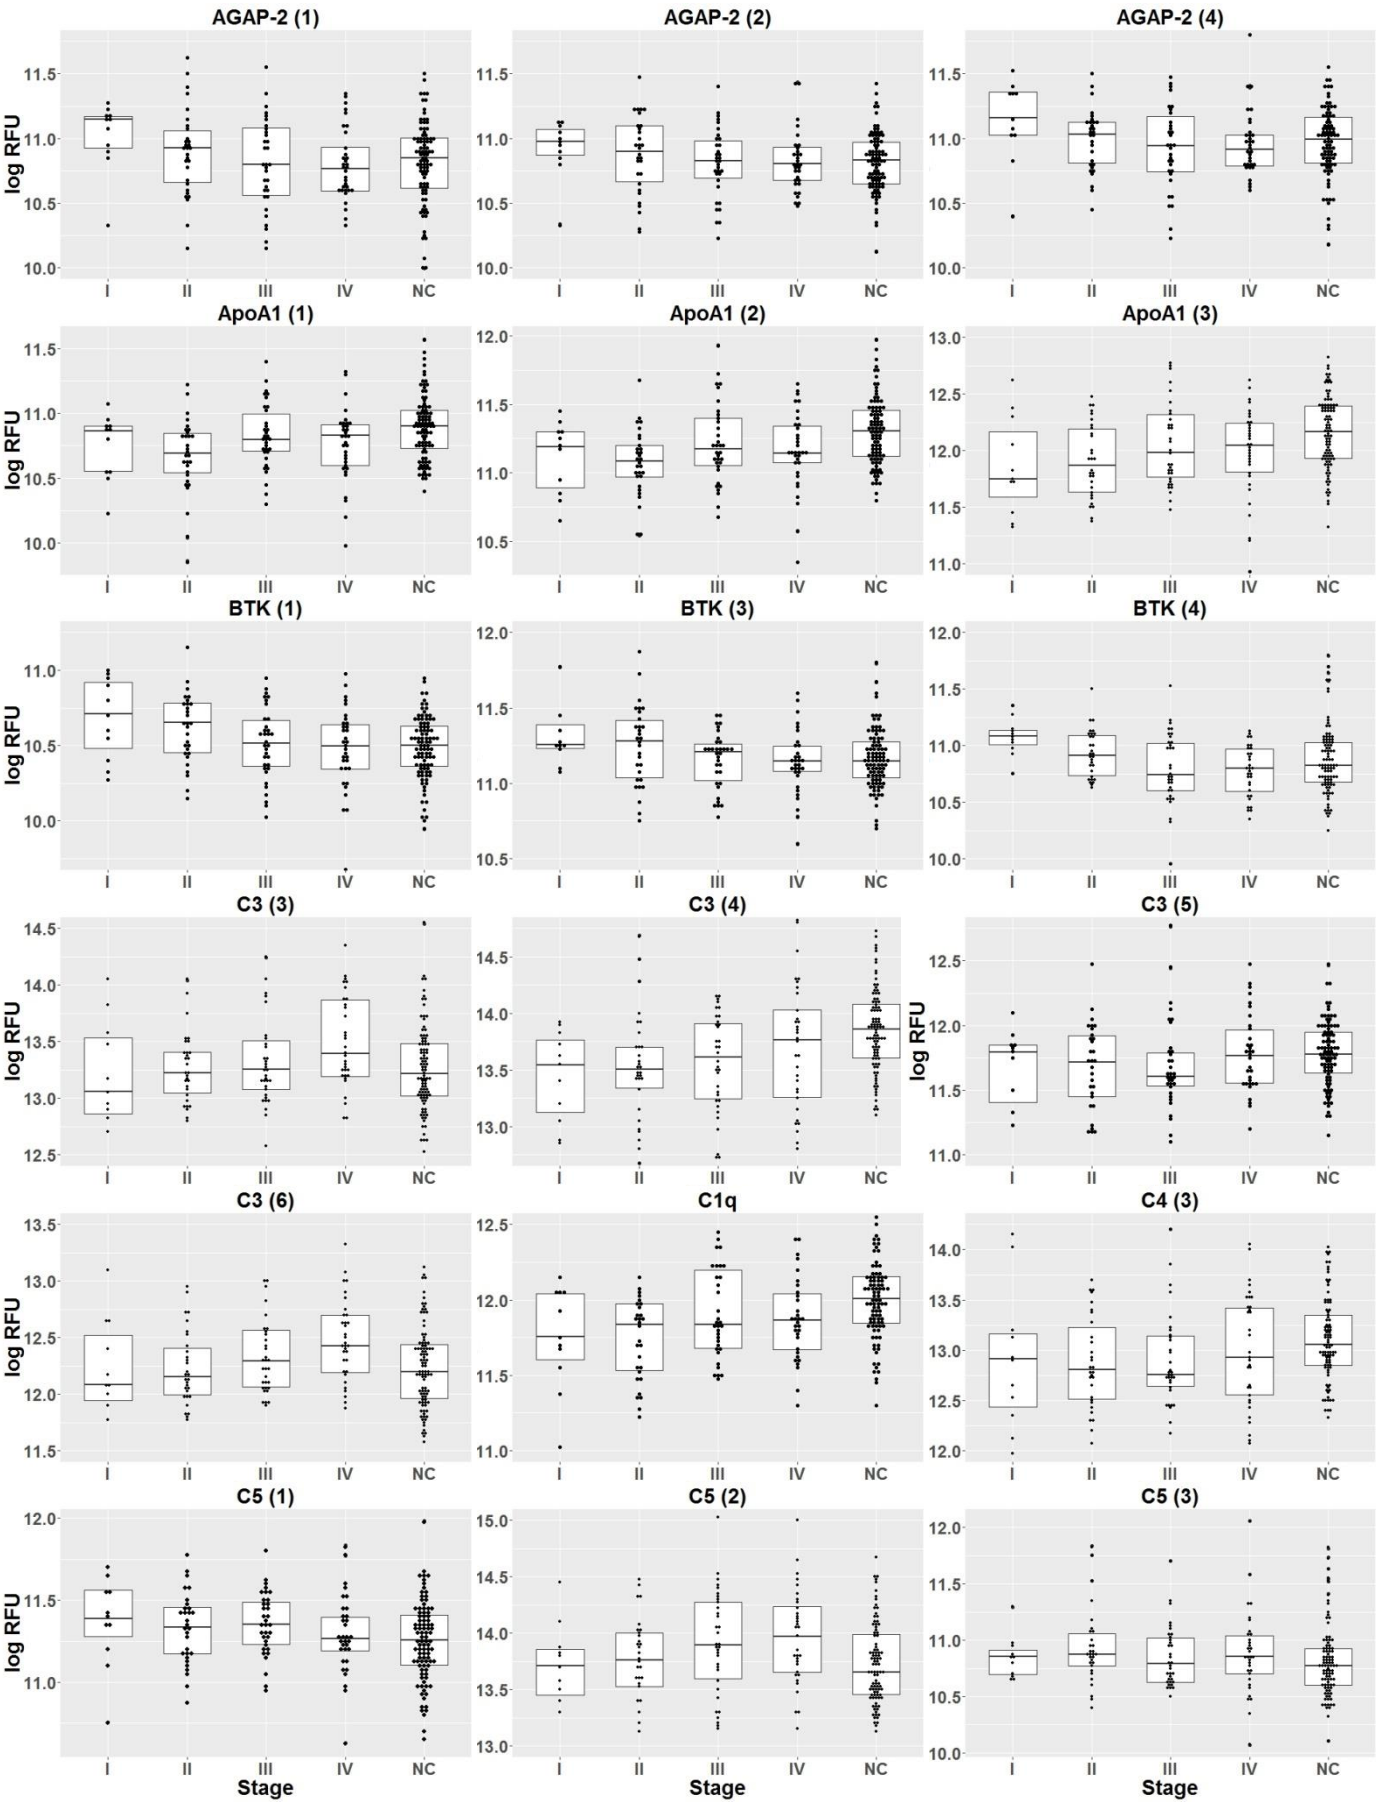

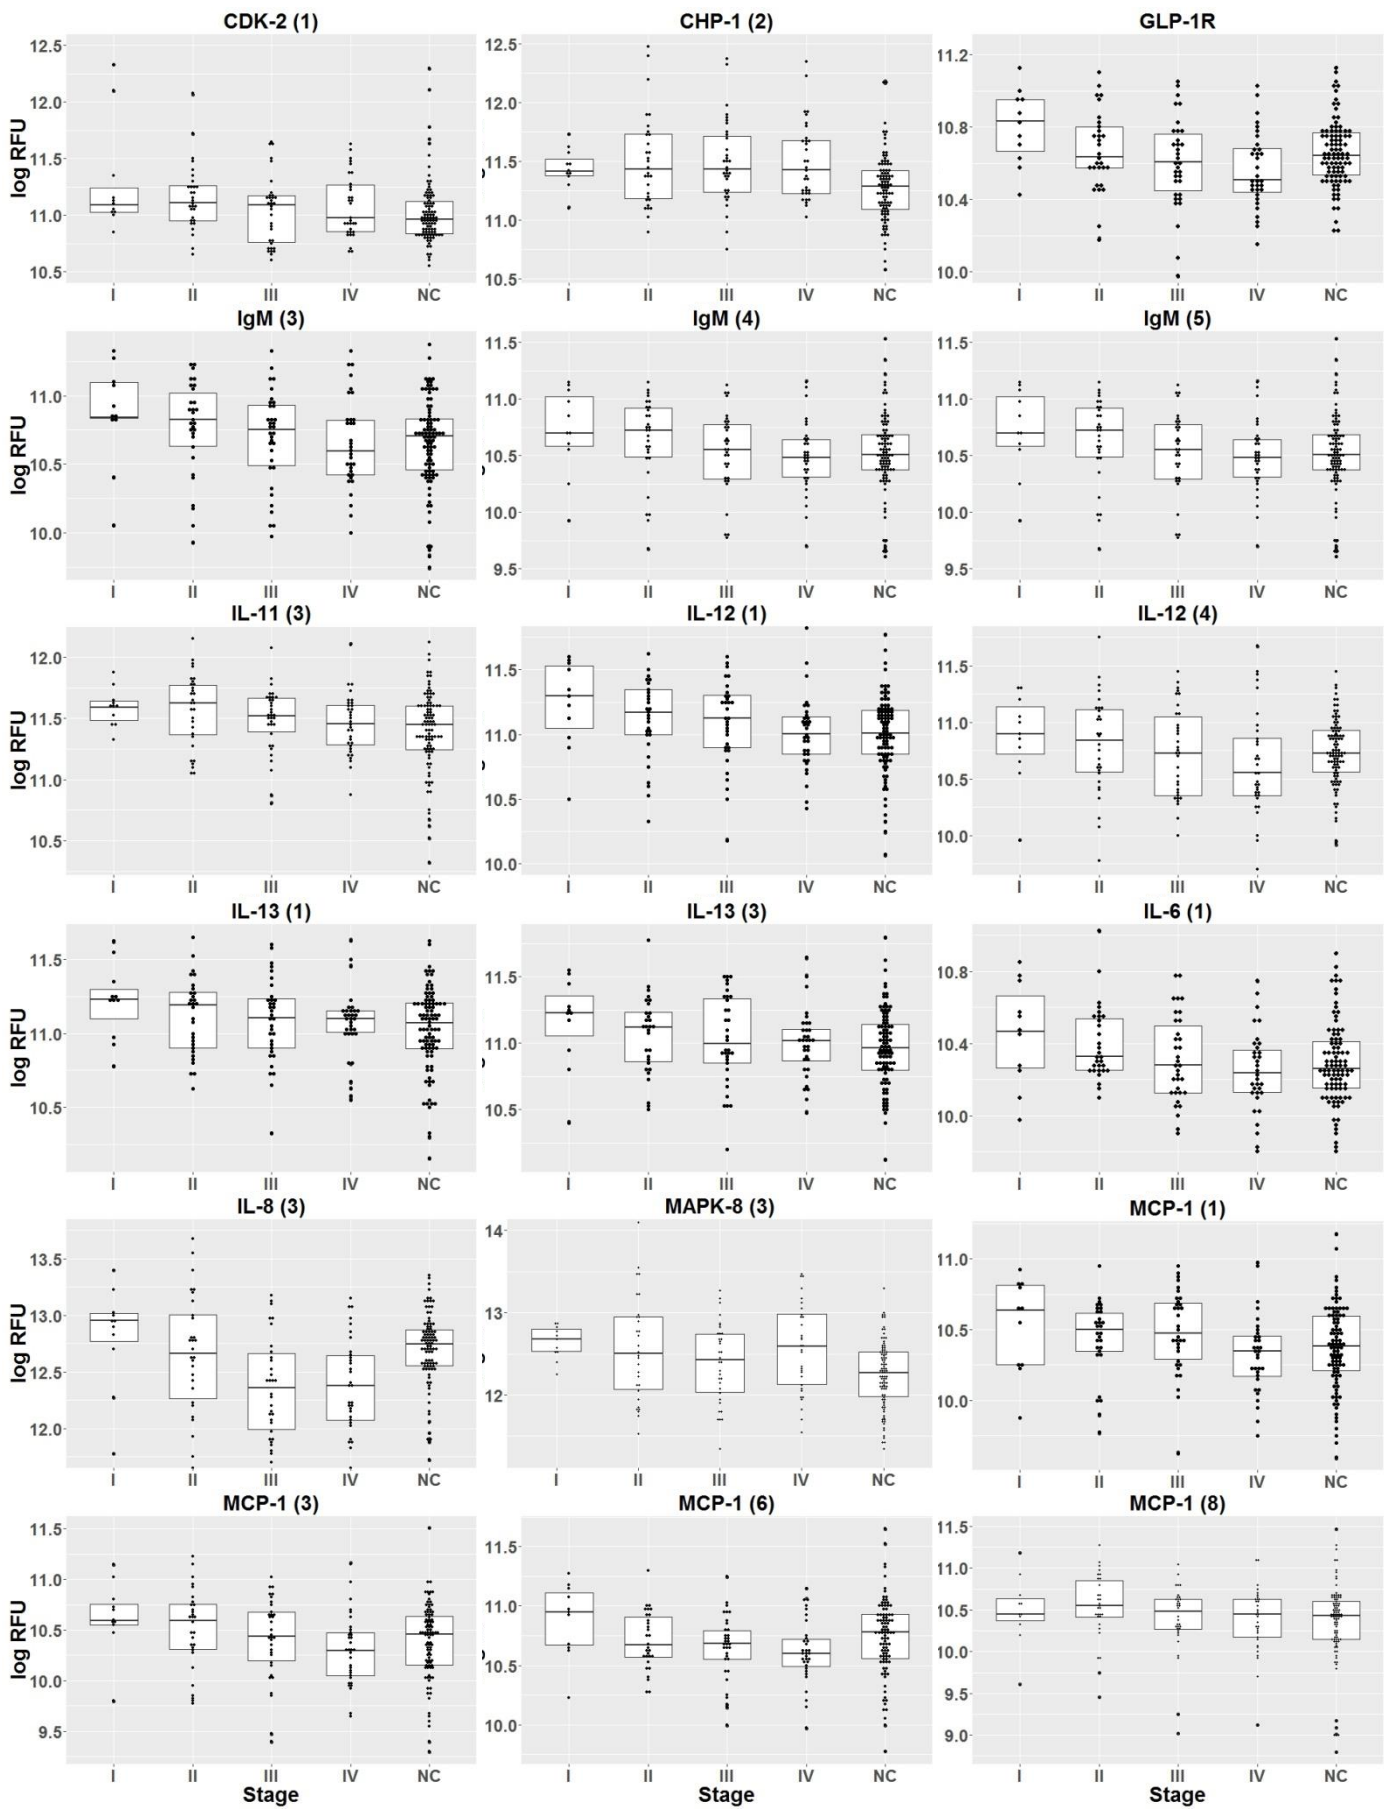

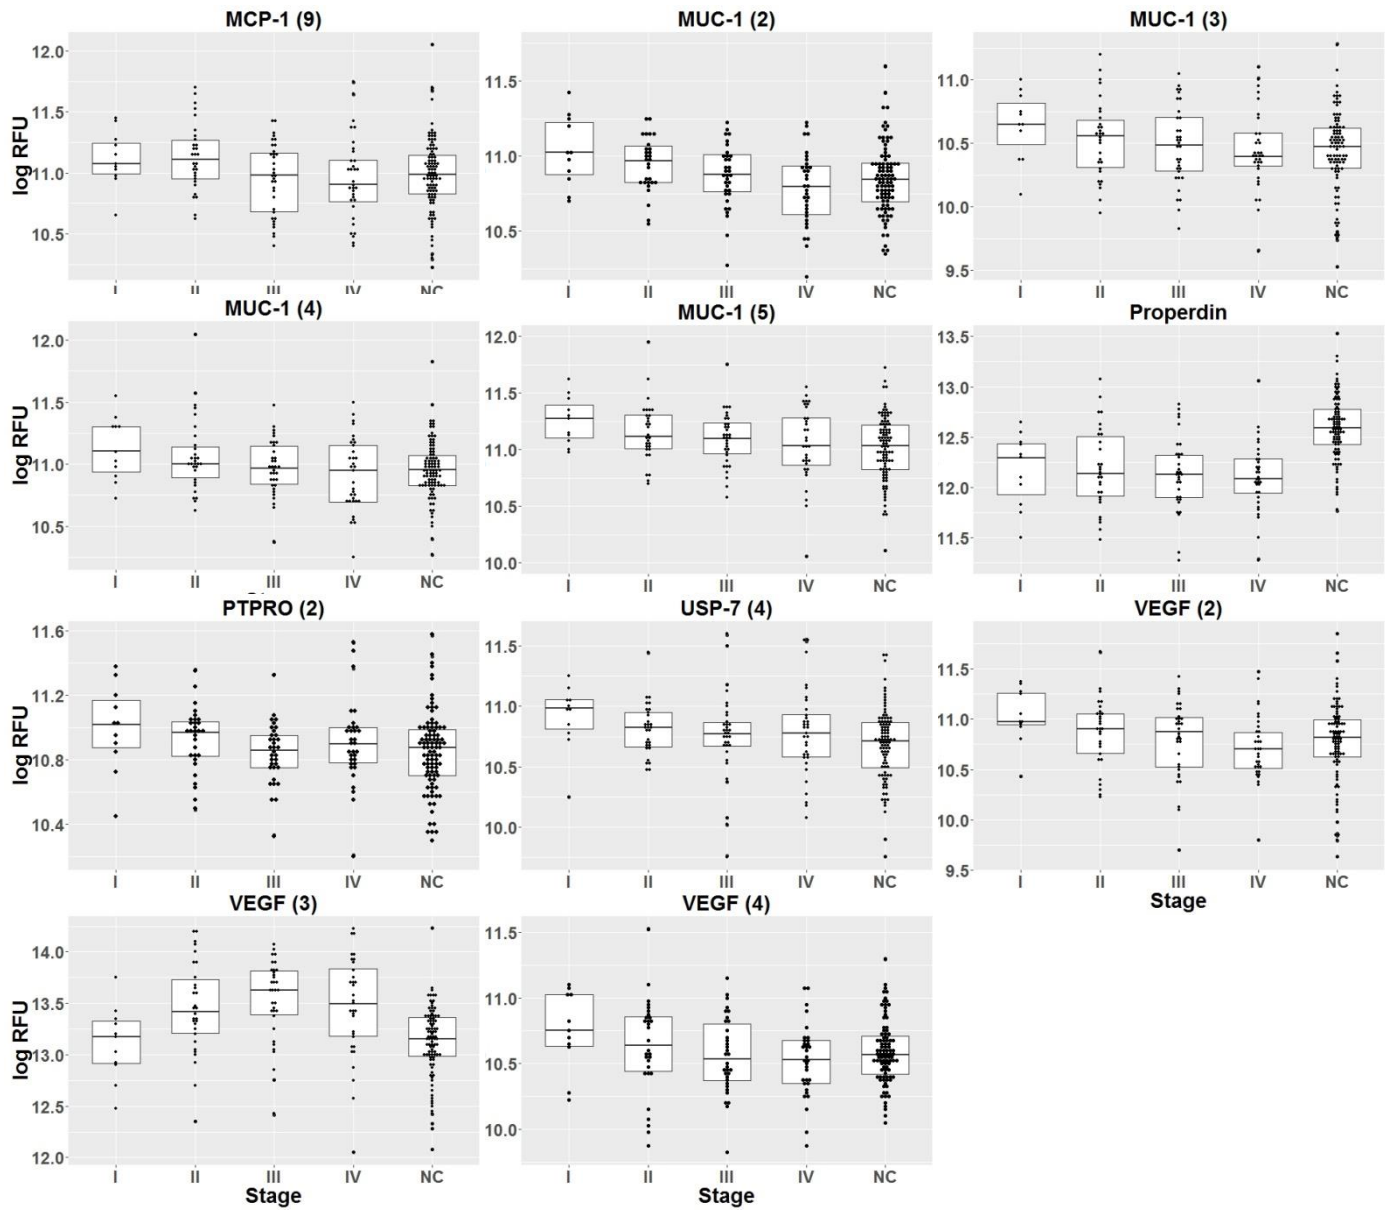

**Supplementary Figure 2. Discrimination of PDAC stages and controls.** Dotplots of patients separated into stages and NC, of all antibodies generating Wilcoxon  $p < 0.05$  in one or more PDAC stage compared to NC, as shown in Figure 3B.
