# Supplementary material
Source: PubMed Central journal article supplement (PMC5423191)
Supplement: MOL2-10-1305-s004.pdf [file MOL2-10-1305-s004.pdf]

A

|                                                                 | PDAC vs NC [1] | Chronic pancreatitis vs NC [2] | PDAC vs NC [Current cohort] |
|-----------------------------------------------------------------|----------------|--------------------------------|-----------------------------|
| No of cases                                                     | 34             | 16                             | 108                         |
| No of controls                                                  | 30             | 30                             | 94                          |
| Sample format                                                   | Serum          | Serum                          | Plasma                      |
| Patient ethnicity                                               | Caucasian      | Caucasian                      | Asian (Chinese)             |
| Cancer stage                                                    | III-IV         | N/A                            | I-IV                        |
| No of non-redundant significant (wilcoxon $p < 0.05$ ) analytes | 33             | 19                             | 25                          |

B

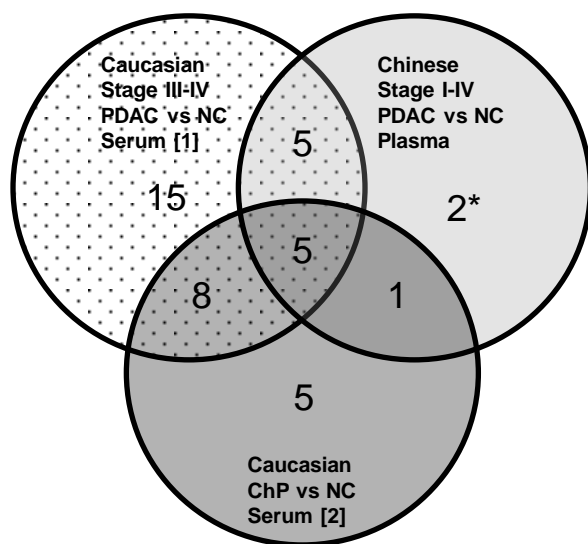

[1] Wingren C, Sandstrom A, Segersvard R, Carlsson A, Andersson R, Lohr M, Borrebaeck CA. Identification of serum biomarker signatures associated with pancreatic cancer. *Cancer Res.* 2012;**72**: 2481-90

[2] Serum proteome profiling of pancreatitis using recombinant antibody microarrays reveals disease-associated biomarker signatures. *Proteomics Clin Appl.* 2012;**6**: 486-96

**Supplementary Figure 3. Comparison to previous cohorts.** A) Details of the three studies being compared. B) Venn diagram derived from overlapping markers analyzed in a (i) Caucasian cohort of Stage III-IV PDAC vs. controls, (ii) Chronic pancreatitis patients vs. controls, and the current (iii) Chinese cohort of Stage PDAC vs. controls. Numbers denote significantly (Wilcoxon  $p < 0.05$ ) differentially expressed markers. \* In addition, 12 non-overlapping (not analyzed in the serum cohort) markers were significantly differentially expressed in the current Chinese plasma cohort.
