# Supplementary material
Source: PubMed Central journal article supplement (PMC5423191)
Supplement: MOL2-10-1305-s005.pdf [file MOL2-10-1305-s005.pdf]

**Supplementary Table 1. Antibodies included on microarray**

| <i>Antigen</i> | <i>Full name</i>                                                 | <i>No of scFvs</i> | <i>Antigen</i> | <i>Full name</i>                                              | <i>No of scFvs</i> |
|----------------|------------------------------------------------------------------|--------------------|----------------|---------------------------------------------------------------|--------------------|
| AGAP-2         | Arf-GAP with GTPase, ANK repeat and PH-dom.-containing protein 2 | 4                  | KRAS           | GTPase KRAS                                                   | 1                  |
| Apo-A1         | Apolipoprotein A1                                                | 3                  | KSYK           | Tyrosine-protein kinase SYK                                   | 2                  |
| Apo-A4         | Apolipoprotein A4                                                | 3                  | LDL            | Low-density Lipoprotein                                       | 2                  |
| ATP-5B         | ATP synthase subunit beta                                        | 3                  | Leptin         | Leptin                                                        | 1                  |
| BTK            | Tyrosine-protein kinase BTK                                      | 4                  | Lewis x        | Lewis x                                                       | 2                  |
| C1 inh.        | C1 esterase inhibitor                                            | 4                  | Lewis y        | Lewis y                                                       | 1                  |
| C1q*           | Complement C1q                                                   | 1                  | LUM            | Lumican                                                       | 1                  |
| C1s            | Complement C1s                                                   | 1                  | MAD2L-1        | Mitotic arrest deficient 2-like protein 1                     | 3                  |
| C3*            | Complement C3                                                    | 6                  | MAP2K-2        | Mitogen-activated protein kinase kinase 2                     | 3                  |
| C4*            | Complement C4                                                    | 4                  | MAP2K-6        | Mitogen-activated protein kinase kinase 6                     | 4                  |
| C5*            | Complement C5                                                    | 3                  | MAPK-1         | Mitogen-activated protein kinase 1                            | 4                  |
| CD40           | CD40 protein                                                     | 4                  | MAPK-8         | Mitogen-activated protein kinase 8                            | 3                  |
| CD40L          | CD40 ligand                                                      | 1                  | MAPK-9         | Mitogen-activated protein kinase 9                            | 6                  |
| CDK-2          | Cyclin-dependent kinase 2                                        | 2                  | MATK           | Megakaryocyte-associated tyrosine-protein kinase              | 3                  |
| CHP-1          | Calcineurin B homologous protein 1                               | 2                  | MCP-1*         | Monocyte chemotactic protein 1                                | 9                  |
| CHX-10         | Visual system homeobox 2                                         | 3                  | MCP-3          | Monocyte chemotactic protein 3                                | 7                  |
| CIMS-10        | Selection motif TEEQLK                                           | 1                  | MCP-4          | Monocyte chemotactic protein 4                                | 3                  |
| CIMS-13        | Selection motif SSAYSR                                           | 1                  | MUC-1          | Mucin 1                                                       | 6                  |
| CIMS-5         | Selection motif WTRNSNMNYWLIIRL                                  | 1                  | Myom-2         | Myomesin-2                                                    | 2                  |
| CK19           | Cytokeratin 19                                                   | 3                  | NDC80          | Kinetochore protein NDC80 homolog                             | 3                  |
| CT17           | Cholera toxin subunit B                                          | 1                  | ORP-3          | Oxysterol-binding protein-related protein 3                   | 2                  |
| CystC          | Cystatin C                                                       | 4                  | OSTP           | Osteopontin                                                   | 3                  |
| Digoxin        | Digoxin                                                          | 1                  | P85A           | PI3-kinase subunit p85-alpha                                  | 3                  |
| DUSP-9         | Dual specificity protein phosphatase 9                           | 1                  | PAK-7          | Serine/threonine-protein kinase PAK 7                         | 3                  |
| EGFR           | Epidermal growth factor receptor                                 | 1                  | PAR-6B         | Partitioning defective 6 homolog beta                         | 2                  |
| Eotaxin        | Eotaxin                                                          | 3                  | PARP-1         | Poly [ADP-ribose] polymerase 1                                | 1                  |
| ErbB-2         | Receptor tyrosine-protein kinase erbB-2                          | 4                  | PGAM-5         | Phosphoglycerate mutase family member 5                       | 4                  |
| Factor B*      | Complement factor B                                              | 4                  | PKB gamma      | RAC-gamma serine/threonine-protein kinase                     | 2                  |
| FASN           | Fatty acid synthase                                              | 4                  | PRD-14         | PR domain zinc finger protein 14                              | 5                  |
| GAK            | Cyclin G-associated kinase                                       | 3                  | Procathepsin W | Procathepsin W                                                | 1                  |
| GEM            | GTP-binding protein GEM                                          | 2                  | Properdin*     | Properdin                                                     | 1                  |
| GLP-1          | Glucagon-like peptide-1                                          | 1                  | PSA            | Prostate-specific antigen                                     | 1                  |
| GM-CSF         | Granulocyte-macrophage colony-stimulating factor                 | 6                  | PTK-6          | Protein-tyrosine kinase 6                                     | 1                  |
| GNAI-3         | Guanine nucleotide-binding protein G(k) subunit alpha            | 4                  | PTPN-1         | Tyrosine-protein phosphatase non-receptor type 1              | 3                  |
| GRIP-2         | Glutamate receptor-interacting protein 2                         | 8                  | PTPRJ          | Protein-tyrosine phosphatase receptor type J                  | 8                  |
| HADH-2         | 3-hydroxyacyl-CoA dehydrogenase type-2                           | 4                  | PTPRK          | Protein-tyrosine phosphatase kappa                            | 8                  |
| HLA-DR/DP      | HLA-DR/DP                                                        | 1                  | PTPRO          | Protein tyrosine phosphatase U2                               | 4                  |
| ICAM-1         | Intercellular adhesion molecule 1                                | 1                  | PTPRT          | Protein tyrosine phosphatase rho                              | 3                  |
| IFN-g          | Interferon gamma                                                 | 3                  | RANTES         | RANTES                                                        | 3                  |
| IgM            | Immunoglobulin M                                                 | 5                  | RPS6KA2        | Ribosomal protein S6 kinase alpha-2                           | 3                  |
| IL-10*         | Interleukin 10                                                   | 3                  | Sialle x       | Sialyl Lewis x                                                | 1                  |
| IL-11          | Interleukin 11                                                   | 3                  | Sox11A         | Transcription factor SOX-11                                   | 1                  |
| IL-12*         | Interleukin 12                                                   | 4                  | SPDLY-1        | Spindly                                                       | 2                  |
| IL-13*         | Interleukin 13                                                   | 3                  | STAP-2         | Signal-transducing adaptor protein 2                          | 4                  |
| IL-16          | Interleukin 16                                                   | 3                  | STAT-1         | Signal transducer and activator of transcription 1-alpha/beta | 2                  |
| IL-18          | Interleukin 18                                                   | 3                  | TBC1D-9        | TBC1 domain family member 9                                   | 3                  |
| IL-1a*         | Interleukin 1 alpha                                              | 3                  | TENS-4         | Tensin 4                                                      | 1                  |
| IL-1b          | Interleukin 1 beta                                               | 3                  | TGF-b1         | Transforming growth factor beta-1                             | 3                  |
| IL-1ra         | Interleukin-1 receptor antagonist protein                        | 3                  | TM peptide     | Transmembrane peptide                                         | 1                  |
| IL-2           | Interleukin 2                                                    | 3                  | TNF-a          | Tumor necrosis factor                                         | 3                  |
| IL-3           | Interleukin 3                                                    | 3                  | TNF-b*         | Lymphotoxin-alpha                                             | 4                  |
| IL-4*          | Interleukin 4                                                    | 4                  | TNFRSF-14      | Tumor necrosis factor receptor superfamily member 14          | 2                  |
| IL-5*          | Interleukin 5                                                    | 3                  | TNFRSF-3       | Tumor necrosis factor receptor superfamily member 3           | 3                  |
| IL-6*          | Interleukin 6                                                    | 4                  | TOPBP-1        | DNA topoisomerase 2-binding protein 1                         | 2                  |
| IL-7           | Interleukin 7                                                    | 2                  | UBC-9          | Ubiquitin carrier protein 9                                   | 3                  |
| IL-8*          | Interleukin 8                                                    | 3                  | UBE2C          | Ubiquitin-conjugating enzyme E2 C                             | 2                  |
| IL-9           | Interleukin 9                                                    | 3                  | UCHL5          | Ubiquitin carboxyl-terminal hydrolase isozyme L5              | 1                  |
| Integrin a-10  | Integrin alpha-10                                                | 1                  | UPF3B          | Regulator of nonsense transcripts 3B                          | 2                  |
| Integrin a-11  | Integrin alpha-11                                                | 1                  | USP-7          | Ubiquitin-specific-processing protease 7                      | 4                  |
| JAK3           | Tyrosine-protein kinase JAK3                                     | 1                  | VEGF*          | Vascular endothelial growth factor                            | 4                  |

\*Specificity determined by protein arrays, cytokine arrays, ELISA, blocking/spiking experiments and/or mass spectrometry.
